# Supplementary material for: A new approach for identifying innate immune defects
Source: publisher site journal article supplement (doi:10.1515/dx-2024-0107), 2024-07-15
Supplement: Supplementary file 1 [file j_dx-2024-0107_suppl_004.pdf]

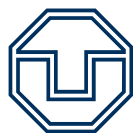

**TECHNISCHE  
UNIVERSITÄT  
DRESDEN**

CRTD – Center for Regenerative Therapies Dresden

CRTD, Fetscherstraße 105, 01307 Dresden

To whom it may concern

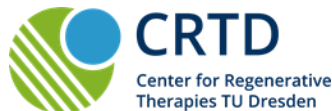

**Prof. Dr. Federico Calegari**  
CRTD Director  
Research Group Leader CRTD  
Neural Stem Cells in Mammalian Brain

Tel.: +49 351 458-82052  
E-mail : [federico.calegari@tu-dresden.de](mailto:federico.calegari@tu-dresden.de)  
Date: June 13, 2023

## Invitation "CRTD Symposium" in Dresden

Dear editorial board

I am writing to you about the study "A SIMPLE ASSAY FOR IDENTIFYING INNATE IMMUNE DEFECTS UPSTREAM OF NF-KB – A CASE REPORT" by Dr. Ludwig Englmeier et al.

I am the director of the Center of Regenerative Therapies at the Technische Universität Dresden.

Ludwig Englmeier has presented a poster about his "simple assay for identifying innate immune defects upstream of NFkB" at the institute's life science summer conference and has invited the PIs of our institute to voluntarily test the correctness of his concept by self-experimentation. I have conducted the skin prick assay with what was described to me as PBS (negative control) and two concentrations of LPS diluted in PBS – 5mg/ml and 25 mg/ml. A visible small red dot developed at the site of the skin prick selectively for the two LPS samples. The red dots became apparent several hours after the skin prick.

I recommend the study for consideration in your journal.

Yours sincerely,

Prof. Dr. Federico Calegari

Postal address (letters)  
TU Dresden  
01062 Dresden

Visitor address  
Fetscherstraße 105  
01307 Dresden

Tax number  
(Germany)  
203/149/02549

Bank details  
Commerzbank AG,  
Dresden Branch

TU Dresden is a  
partner in the  
DRESDEN-concept  
alliance

Postal address (packages)  
TU Dresden, CRTD  
Fetscherstraße 105  
01307 Dresden

Accessible entrance  
via main entrance,  
and elevator

VAT number  
(international)  
DE 188 369 991

IBAN  
DE52 8504 0000 0800 4004 00  
BIC  
COBADEFF850

**DRESDEN  
concept**

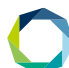

[tu-dresden.de/cmcb/crtcd](https://tu-dresden.de/cmcb/crtcd)

Not for electronically signed or encrypted electronic documents.
